# Supplementary material for: Intermolecular Tl⋯H–C anagostic interactions in luminescent pyridyl functionalized thallium(i) dithiocarbamates
Source: Royal Society of Chemistry journal article supplement (doi:10.1039/c4dt03032j), 2014-11-19
Supplement: c4dt03032j1.pdf [file c4dt03032j1.pdf]

## Intermolecular Tl...H-C anagostic interactions in luminescent pyridyl functionalized thallium (I) dithiocarbamates

Vinod Kumar,<sup>a</sup> Vikram Singh,<sup>a</sup> Ajit N. Gupta,<sup>a</sup> Michael G. B. Drew<sup>b</sup> and Nanhai Singh<sup>\*a</sup>

<sup>a</sup>Department of Chemistry, Banaras Hindu University, Varanasi 221005, India

<sup>b</sup>Department of Chemistry, University of Reading, Whiteknights, Reading, RG6 6AD, U.K.

### Electronic Supplementary Material (ESI)

**Table S1.** Selected bond lengths (Å) and angles (°) for complexes.

| Bond Distances              | <b>1</b>  | <b>2</b>  | <b>3</b>   | <b>4</b>   |
|-----------------------------|-----------|-----------|------------|------------|
| Tl(1)—N(36)\$3              | 2.980(12) | 2.921(13) | 2.934(7)   | 2.919(6)   |
| Tl(1)—S(13)                 | 2.961(4)  | 2.976(4)  | 3.008(2)   | 3.021(2)   |
| Tl(1)—S(11)                 | 3.051(3)  | 3.054(3)  | 3.072(2)   | 3.054(2)   |
| Tl(1)—S(13)\$1              | 3.218(4)  | 3.212(4)  | 3.234(2)   | 3.191(2)   |
| Tl(1)—S(11)\$1              | 3.333(3)  | 3.387(3)  | 3.269(2)   | 3.283(2)   |
| Tl(1)—S(13)\$2              | 3.500(4)  | 3.478(3)  | 3.431(2)   | 3.356(2)   |
| Tl(1)—Tl(1)\$1              | 3.771(2)  | 3.817(12) | 3.763(1)   | 3.735(1)   |
| <b>Bond angles</b>          |           |           |            |            |
| S(13)—Tl(1)—S(11)           | 58.75(9)  | 58.83(8)  | 57.98(5)   | 58.41(4)   |
| S(13)—Tl(1)—S(13)\$1        | 104.92(9) | 103.92(8) | 105.94(4)  | 106.14(4)  |
| S(11)—Tl(1)—S(11)\$1        | 107.75(8) | 107.51(7) | 107.25(4)  | 107.88(4)  |
| S(11)—Tl(1)—S(13)\$1        | 81.08(9)  | 81.13(8)  | 80.98(5)   | 81.65(4)   |
| N(36)\$3—Tl(1)—S(13)\$1     | 156.8(3)  | 157.0(3)  | 155.89(16) | 154.37(13) |
| N(36)\$3—Tl(1)—S(11)        | 85.5(3)   | 85.1(3)   | 85.76(15)  | 83.23(13)  |
| N(36)\$3—Tl(1)—S(13)\$2     | 77.9(3)   | 79.5(3)   | 79.97(14)  | 83.27(13)  |
| N(36)\$3—Tl(1)—S(11)\$1     | 149.6(3)  | 149.5(3)  | 150.15(16) | 150.89(13) |
| N(36)\$3-Tl(1)-S(13)        | 83.8(3)   | 84.2(2)   | 79.97(14)  | 82.99(11)  |
| S(13)-Tl(1)-S(11)\$1        | 80.51(9)  | 79.41(8)  | 81.36(5)   | 80.64(4)   |
| S(11)\$1 - Tl(1) - S(13)\$1 | 53.50(8)  | 53.27(8)  | 53.90(5)   | 54.48(4)   |
| S(13)\$1 - Tl(1) - S(13)\$2 | 101.41(6) | 101.69(5) | 100.07(3)  | 99.24(3)   |
| S(11)\$1 - Tl(1) - S(13)\$2 | 103.70(8) | 101.49(8) | 100.30(5)  | 97.59(4)   |
| S(11) - Tl(1) - S(13)\$2    | 141.85(9) | 145.01(8) | 145.83(5)  | 148.52(5)  |
| S(13) - Tl(1) - S(13)\$2    | 149.53(6) | 148.09(6) | 148.35(3)  | 146.73(3)  |
| N(36)\$3- Tl(1) - Tl(1)\$1  | 134.3(2)  | 134.1(2)  | 133.86(4)  | 132.19(4)  |
| S(13)-Tl(1) - Tl(1)\$1      | 55.56(8)  | 54.75(7)  | 55.71(4)   | 55.16(4)   |
| S(11) - Tl(1) - Tl(1)\$1    | 57.33(6)  | 57.78(7)  | 56.05(4)   | 56.78(5)   |
| S(13)\$1- Tl(1) - Tl(1)\$1  | 49.36(8)  | 49.17(7)  | 50.23(4)   | 50.98(4)   |
| S(11)\$1 - Tl(1) - Tl(1)\$1 | 50.42(6)  | 49.73(6)  | 51.21(3)   | 51.10(4)   |
| S(13)\$2-Tl(1) - Tl(1)\$1   | 147.75(7) | 146.32(7) | 146.16(4)  | 144.43(5)  |

Symmetry elements in **1** and **2** \$1 1-x, -y, 1-z \$2 1/2+x, 1/2-y, 1-z; \$3 1/2-x, 1/2+y, z;

In **3** \$1 -x, 2-y, 1-z, \$2 -x, y+1/2, 1/2-z \$3 x, 3/2-y, z-1/2

In **4** \$1 1-x, 1-y, 1-z \$2 1/2-x, 1/2+y, 1-z, \$3 x-1/2, 1/2-y, z

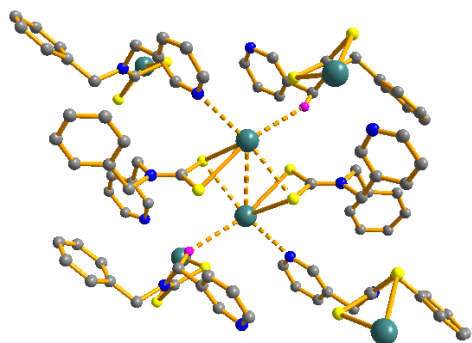

**Fig. S3** 2-D polymeric structure of **1** through interactions within the dimers.

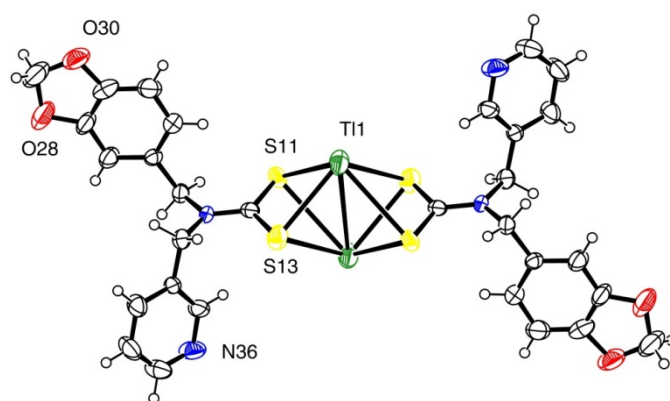

(3)

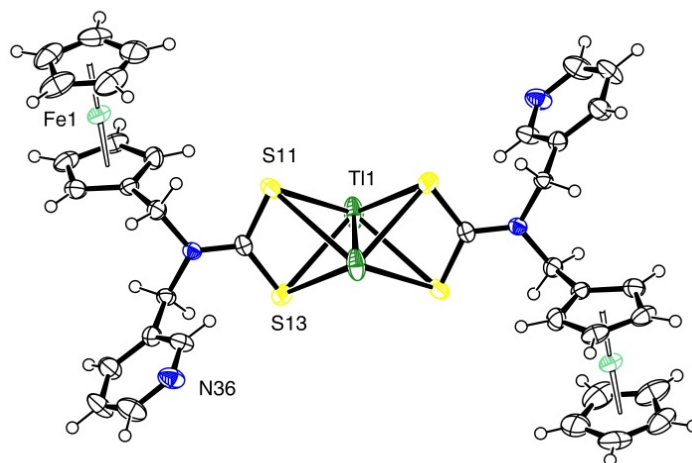

(4)

**Fig. S4** The dimeric structures of **3** and **4** with ellipsoids shown at 30% probability.

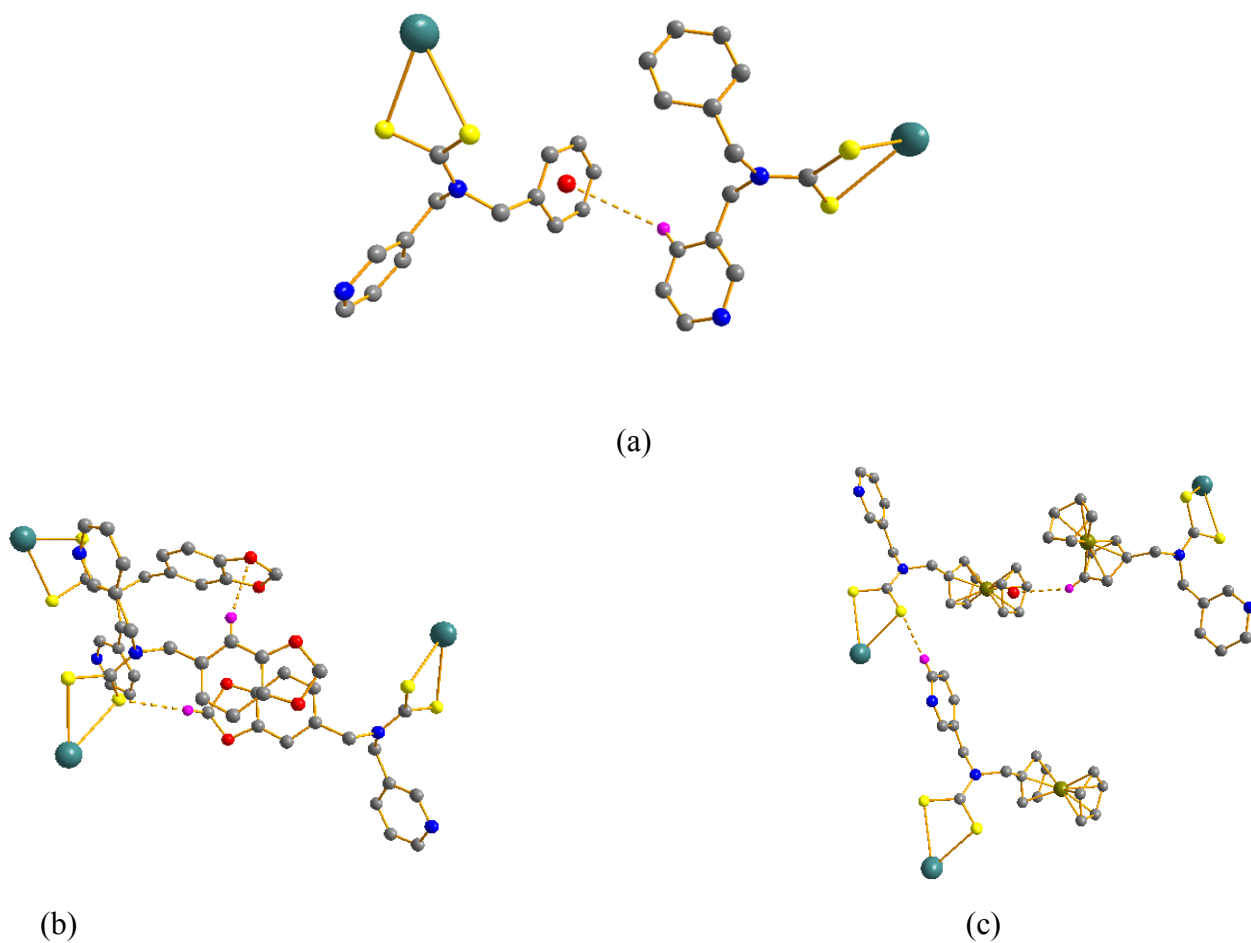

Fig. S5 (a) Supramolecular structure sustained through C-H... $\pi$  in **1**. **2** is isomorphous (b) C-H...S and C-H...O interactions in **3** and (c) C-H... $\pi$  and C-H...S interactions in **4**.

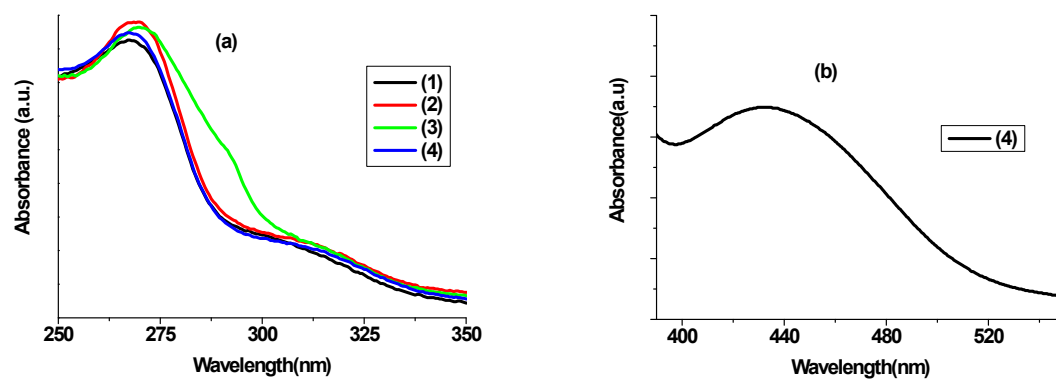

Fig. S6 (a) Electronic absorption spectra of **1-4** in solution (b) for **4** an additional band at low energy.

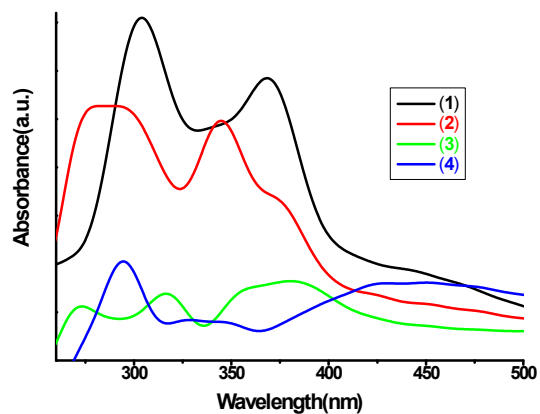

Fig. S7 Solid phase (nujol mull) UV-Vis. spectra of **1-4**.

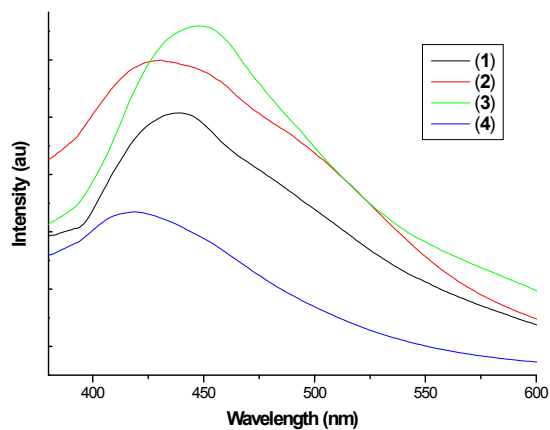

Fig. S8 Photoluminescence spectra in solid state (**1-4**).

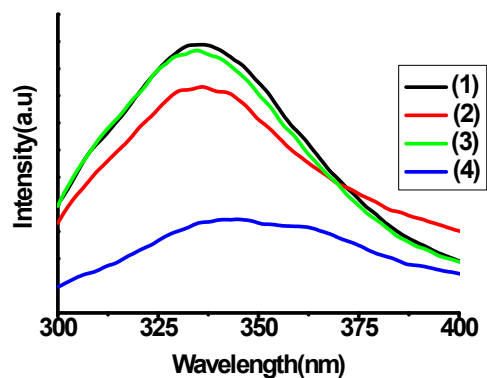

Fig. S9 Excitation and emission spectra of **1-4** at  $\lambda_{\text{ex}} = 300$  nm in solution.
